# Supplementary material
Source: PubMed Central journal article supplement (PMC3184310)

# Supplementary information

- S1 Enlarged images from figure 1B.
- S2 Example of immunohistochemical controls
- S3 Example of ex-vivo imaging of organ involvement with mets
- S4 Quantification of mets in mice bearing MCF-7TR/Luc/Trask tumors
- S4 Example of necropsy analysis of peritoneal dissemination

# S1

case

normal colon

invasive carcinoma

1

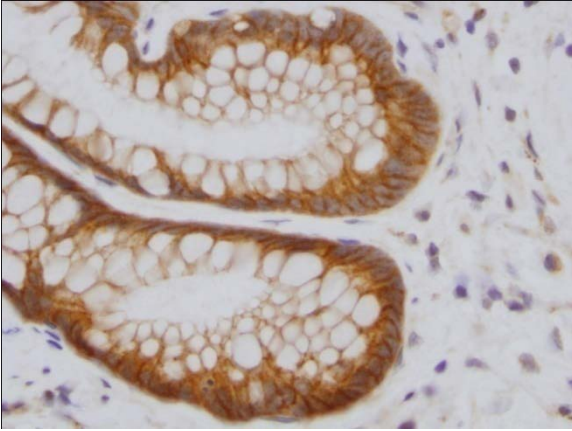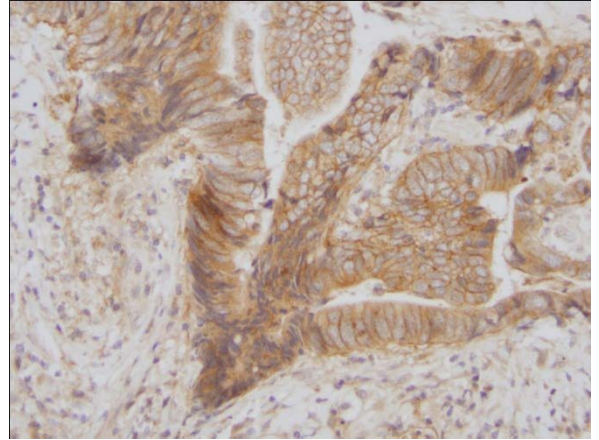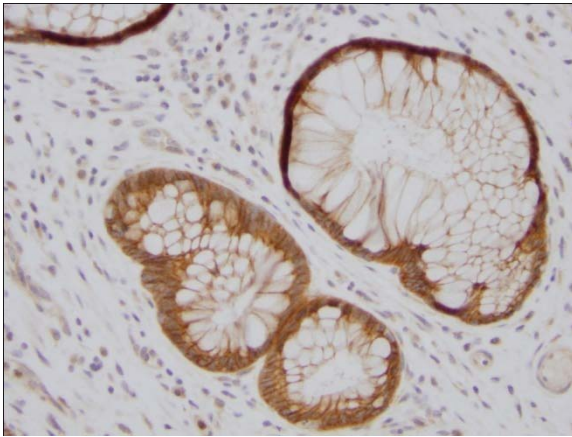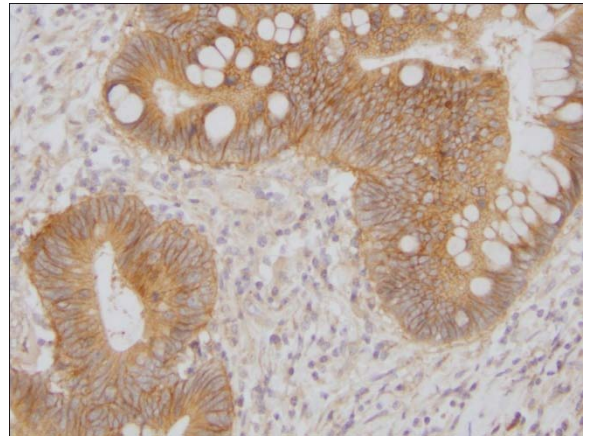

2

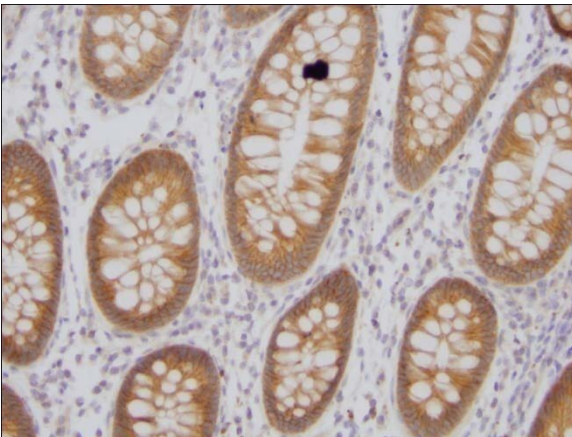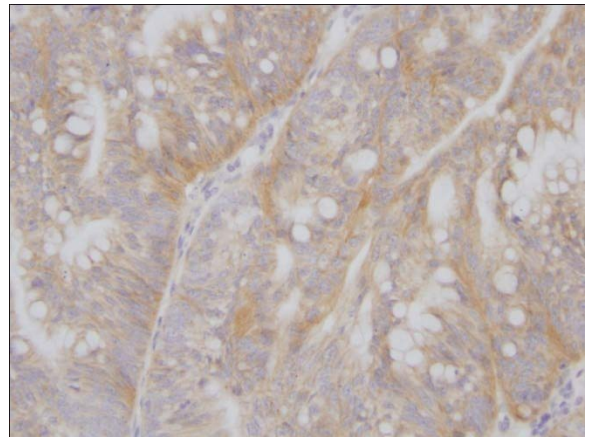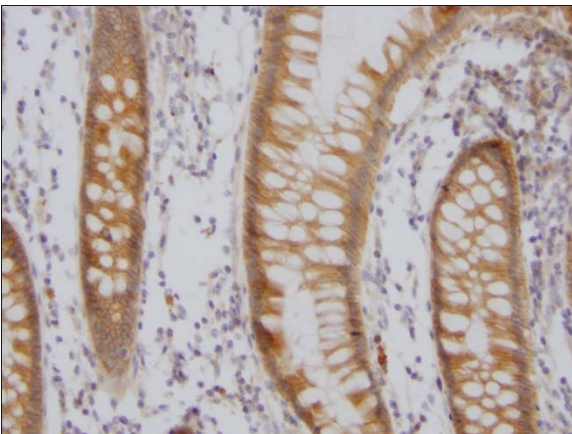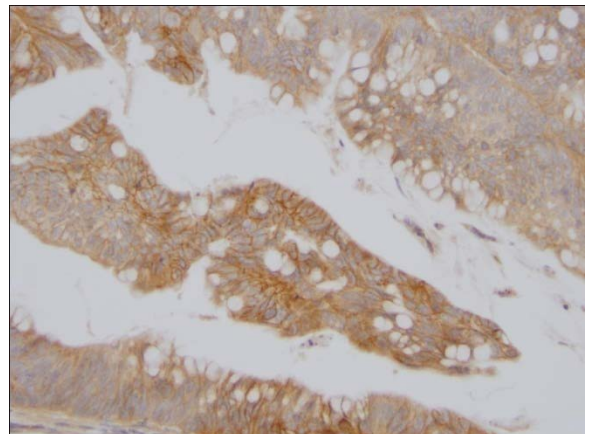



# S1

case

normal colon

invasive carcinoma

3

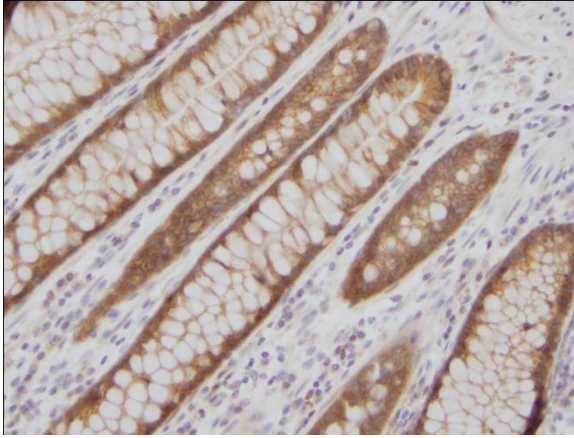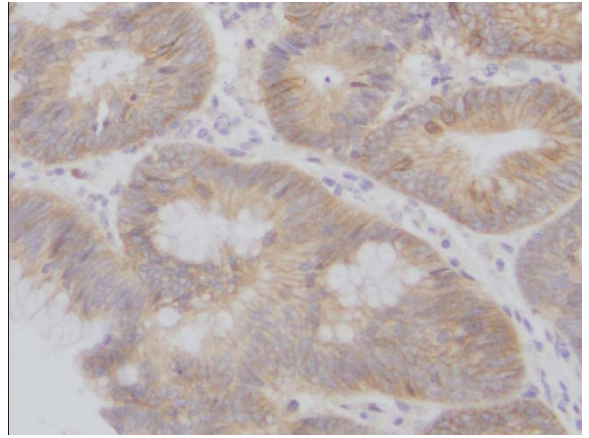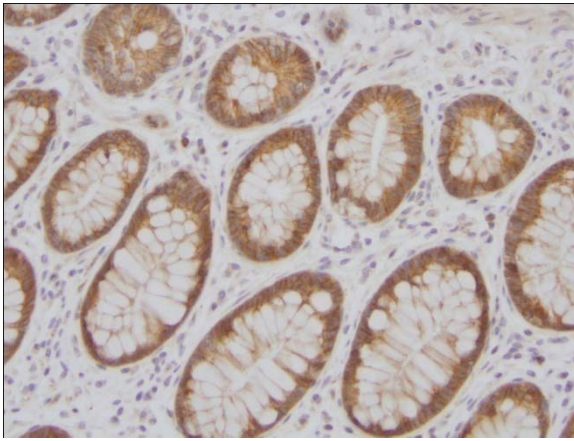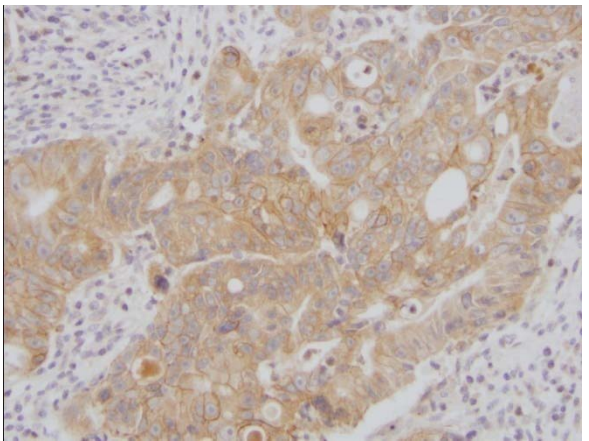

4

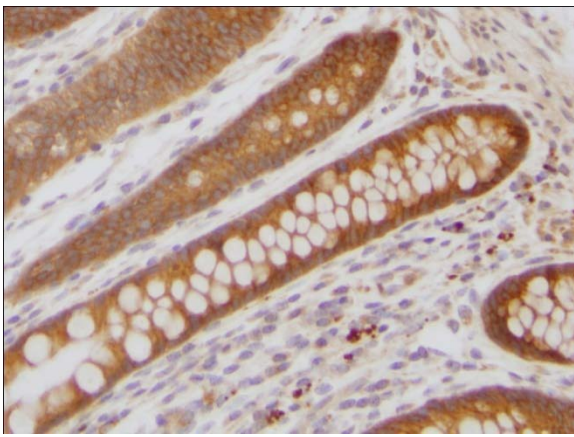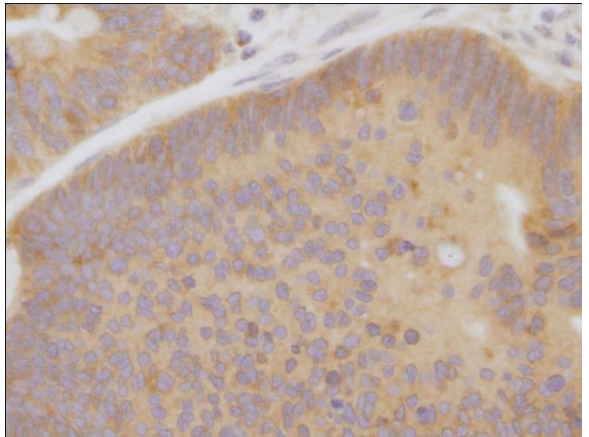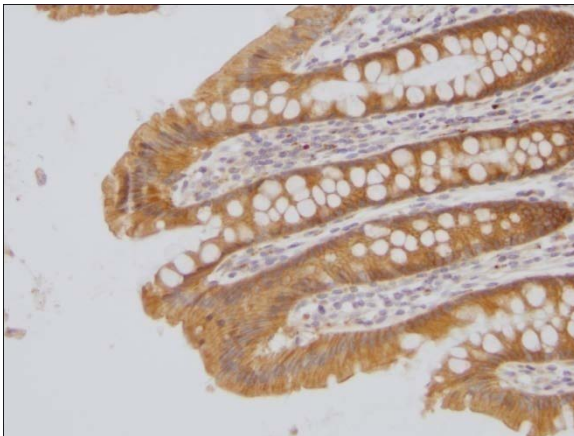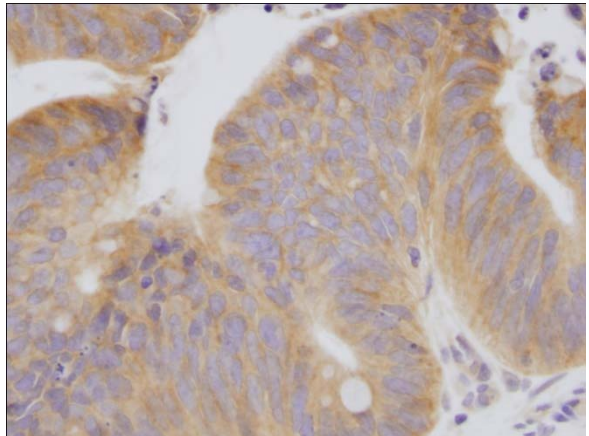



# S1

case

normal colon

invasive carcinoma

5

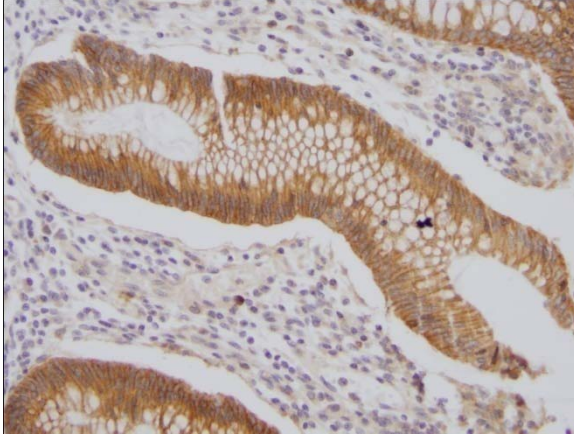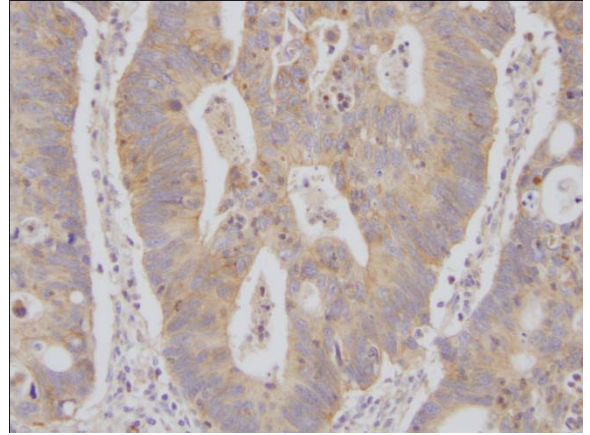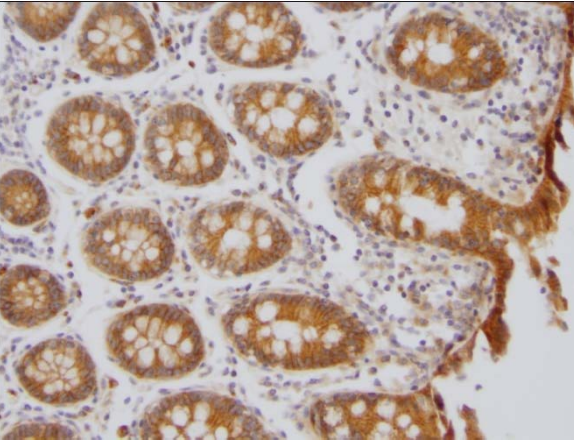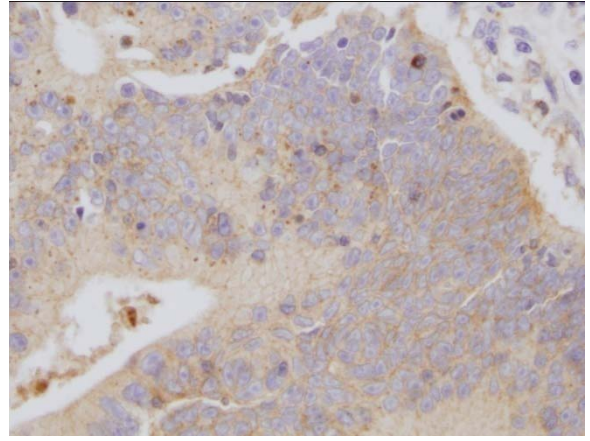

6

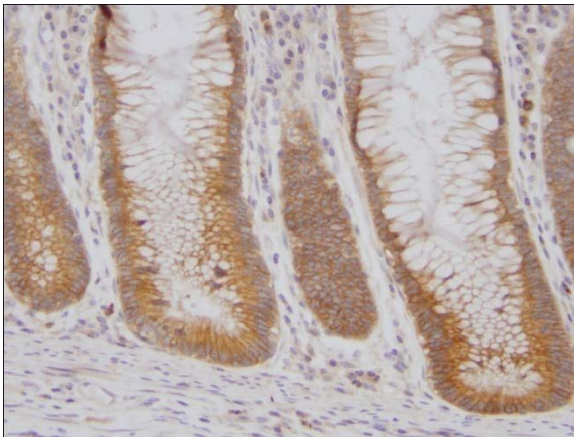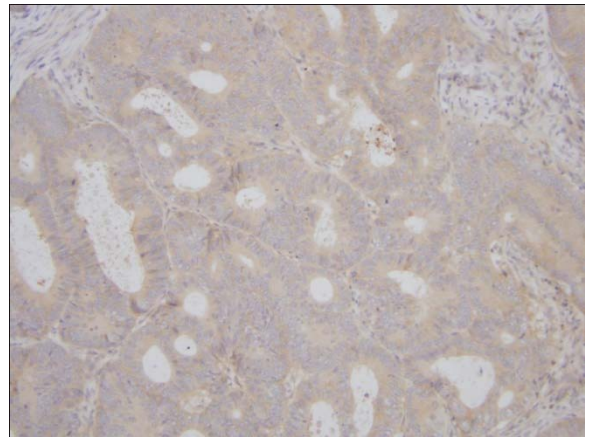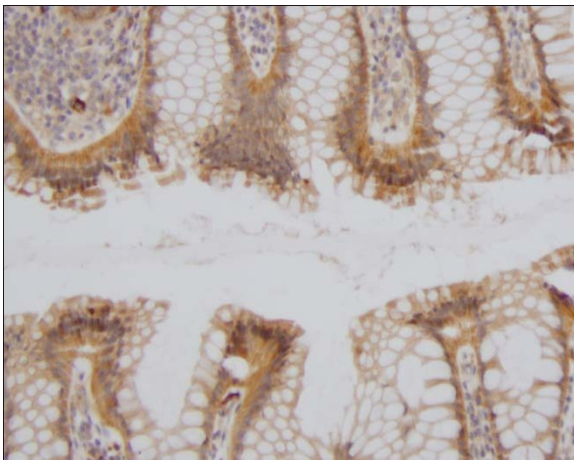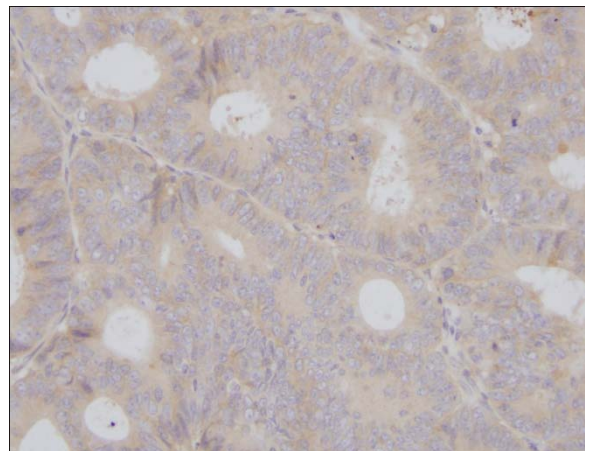



# S1

case

normal colon

invasive carcinoma

7

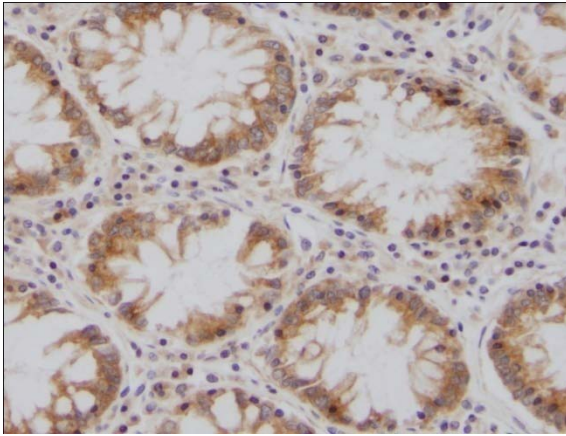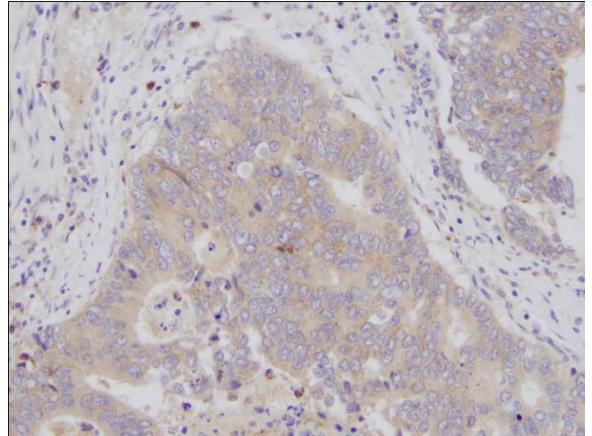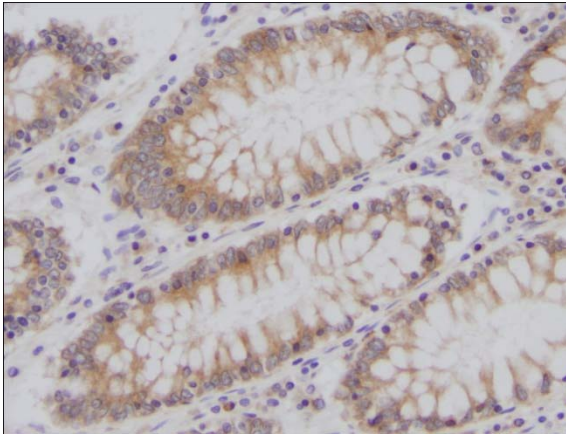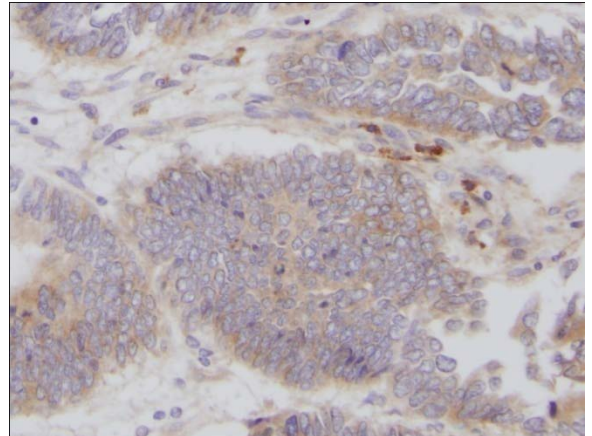

8

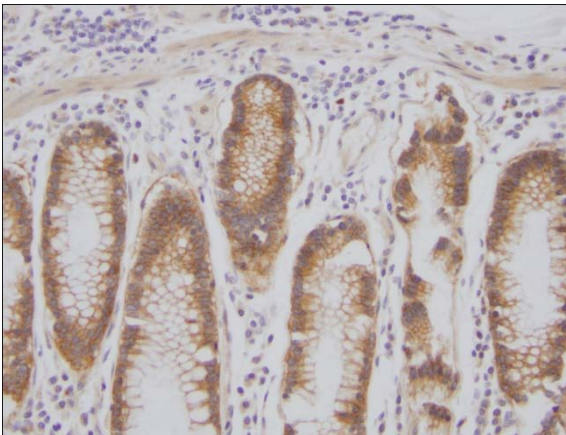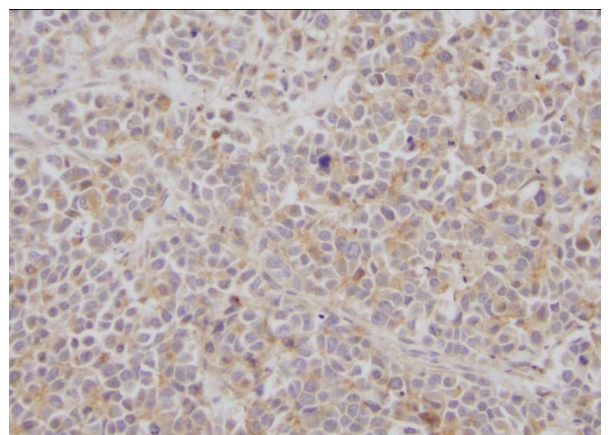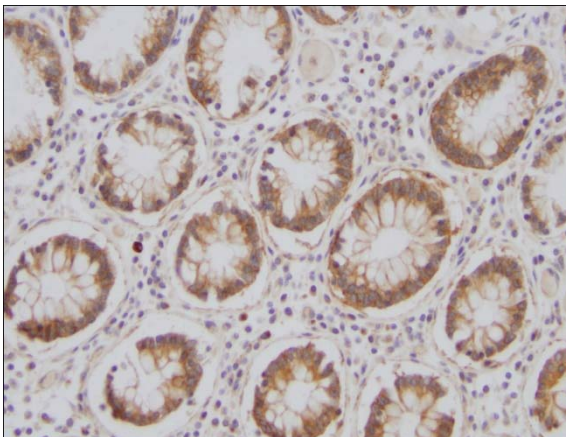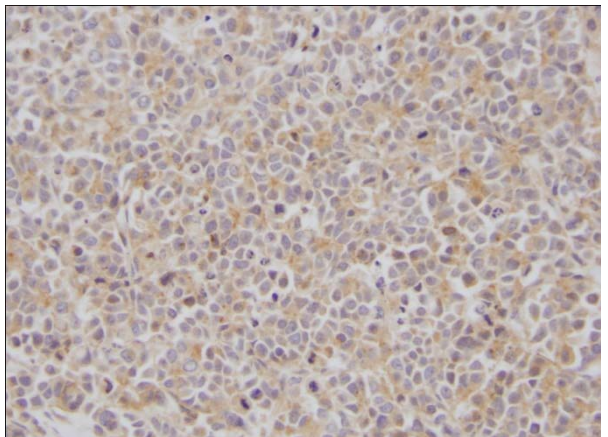



## S2

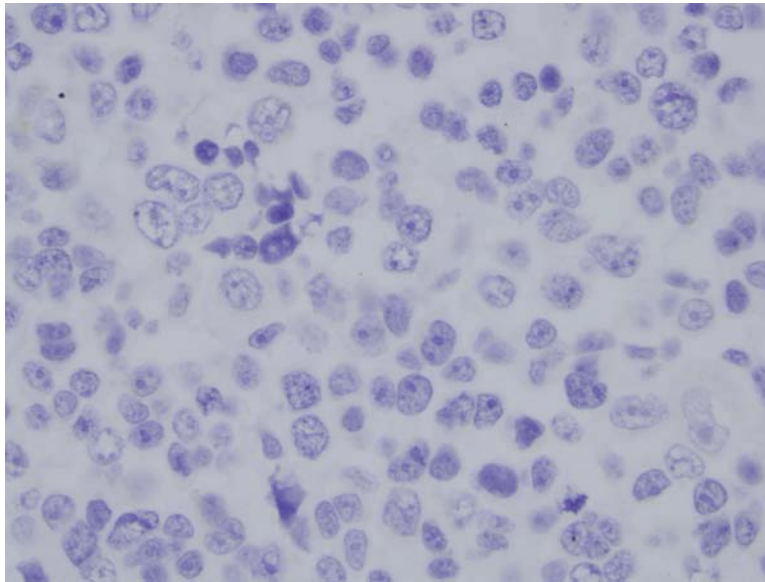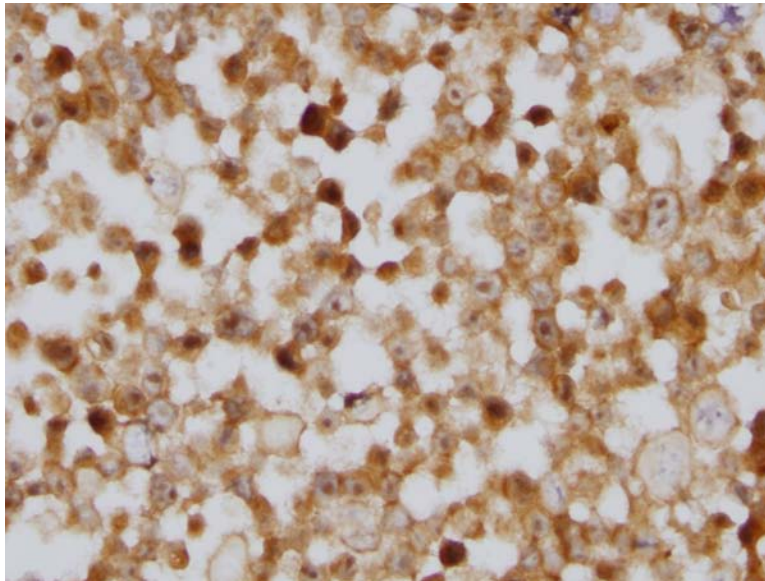

Shown here are negative and positive controls used in our immunohistochemical studies. The negative control (above) was MCF-7 cells and the positive control (below) was MDA-468 cells which were pelleted, fixed in formalin, and embedded in paraffin. Sections from these controls were run side-by-side with every immunohistochemical staining study.

**S3**

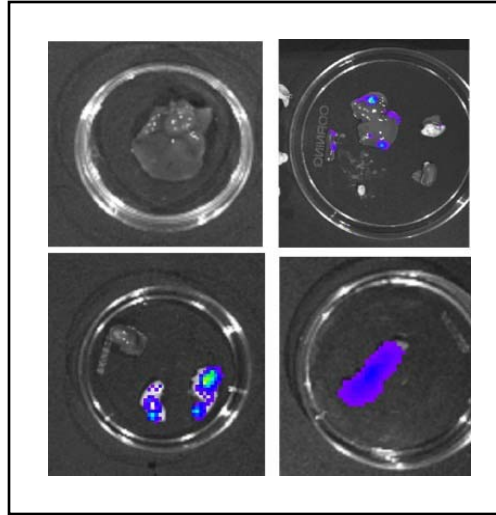

Example of ex-vivo imaging of organ involvement at necropsy in mice bearing orthotopic MCF-7TR/Luc/Trask tumors

**S4**

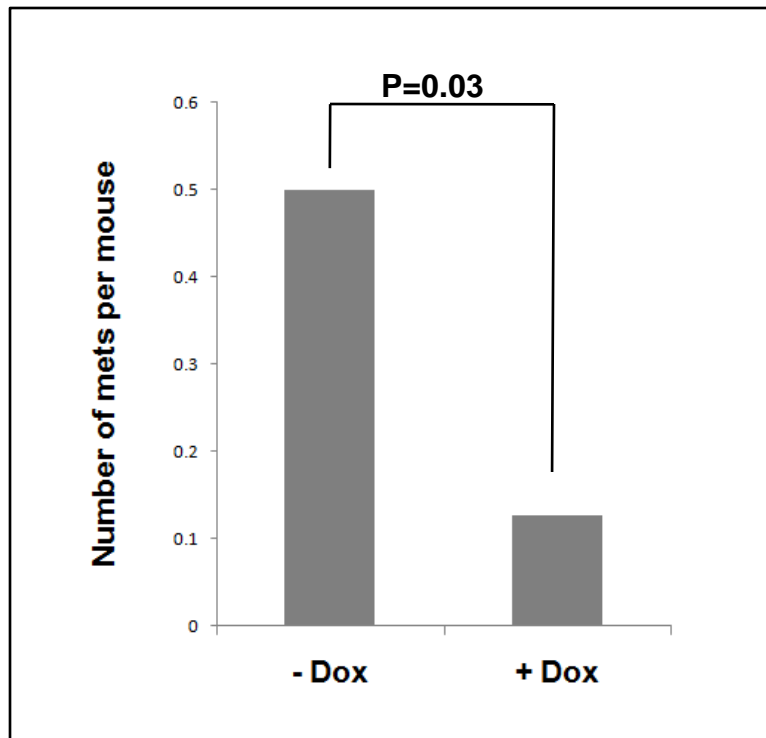

Quantification of tumor metastases in mice bearing MCF-7TR/Luc/Trask tumors comparing the number of mets per mouse.



**S5**

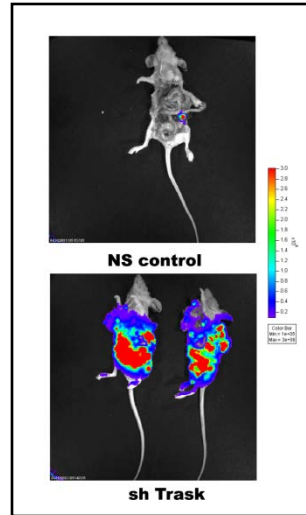

Example of necropsy imaging of peritoneal dissemination post-pancreatectomy in mice bearing orthotopic L3.6pl-shTrask tumors. Peritoneal dissemination was confirmed histologically by sampling peritoneal metastatic nodules in many of the mice. H & E sections are shown below.

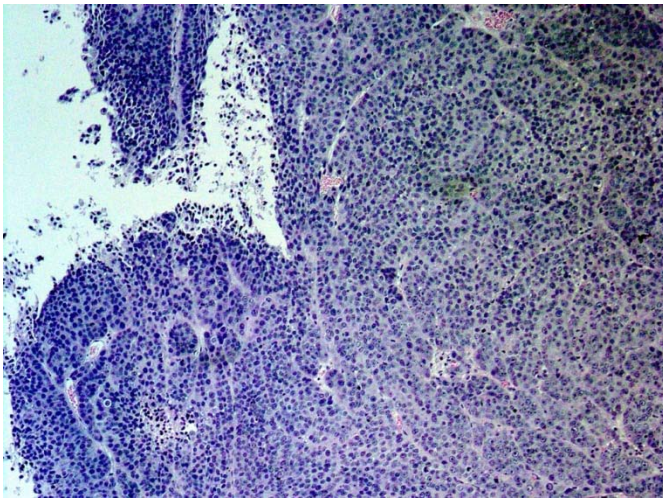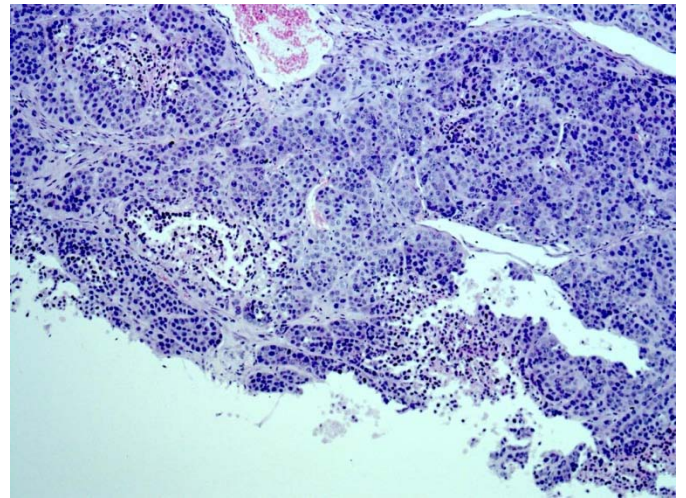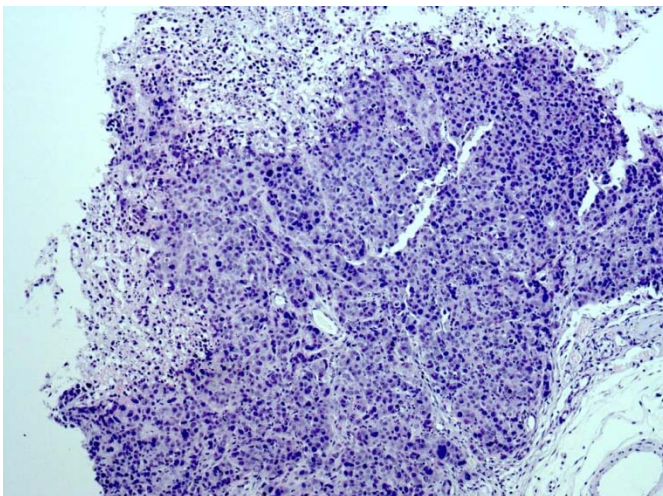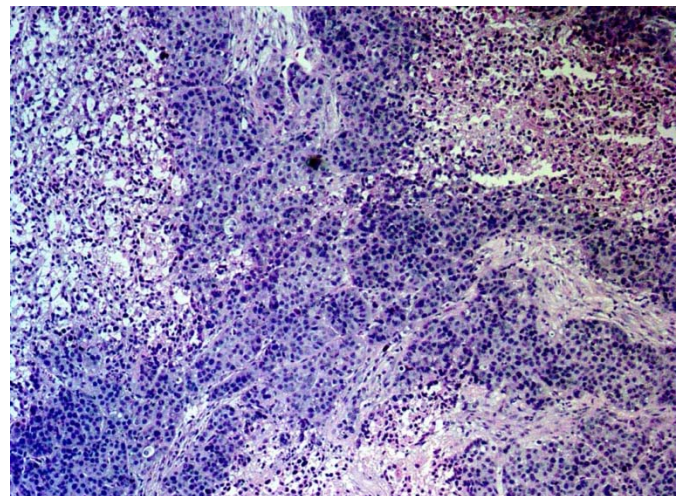

Supplement: NIHMS297078-supplement-1.pdf [file NIHMS297078-supplement-1.pdf]
